# Supplementary material for: Molecular and functional characterization of the adiponectin (AdipoQ) gene in goat skeletal muscle satellite cells
Source: PubMed Central journal article supplement — Asian-Australas J Anim Sci. 2018 Jan 30;31(8):1088–97. doi: 10.5713/ajas.17.0407 (PMC6043445; doi:10.5713/ajas.17.0407), 2018-01-30
Supplement: ajas-31-8-1088-supplementary.pdf [file ajas-31-8-1088-supplementary.pdf]

**Table S1** Homology of AdipoQ, AdipoR1 and AdipoR2 protein sequences between the goat and other species

| <i>Species</i>      | <i>AdipoQ</i> (%) | <i>AdipoR1</i> (%) | <i>AdipoR2</i> (%) |
|---------------------|-------------------|--------------------|--------------------|
| <i>Homo sapiens</i> | 81.17             | 96.80              | 86.27              |
| <i>Bos taurus</i>   | 87.45             | 99.20              | 92.49              |
| <i>Mus musculus</i> | 81.59             | 97.07              | 84.20              |
| <i>Ovis aries</i>   | 99.16             | 99.73              | 94.04              |

Protein sequences were obtained from GenBank: NP\_001171271 (*AdipoQ-Homo sapiens*); NP\_777167 (*AdipoQ-Bos taurus*); NP\_033735 (*AdipoQ-Mus musculus*); XP\_011952838.1 (*AdipoQ-Ovis aries*); AHA11393.1 (*AdipoQ-Capra hircus*). NP\_001277482.1 (*AdipoR1-Homo sapiens*); NP\_001029227.1 (*AdipoR1-Bos taurus*); NP\_001292998.1 (*AdipoR1-Mus musculus*); NP\_001293039.1 (*AdipoR1-Ovis aries*); AGO58469.1 (*AdipoR1-Capra hircus*). NP\_078827.2 (*AdipoR2-Homo sapiens*); NP\_001035589.1 (*AdipoR2-Bos taurus*); NP\_932102.2 (*AdipoR2-Mus musculus*); XP\_011996052.1 (*AdipoR2-Ovis aries*); AGO58468.1 (*AdipoR2-Capra hircus*).
